# Supplementary material for: Structural and functional analysis of MiD51, a dynamin receptor required for mitochondrial fission
Source: PubMed Central journal article supplement — J Cell Biol. 2014 Feb 17;204(4):477–86. doi: 10.1083/jcb.201311014 (PMC3926961; doi:10.1083/jcb.201311014), 2014-02-17
Supplement: supp_jcb.201311014_JCB_201311014_sm.pdf [file supp_jcb.201311014_JCB_201311014_sm.pdf]

Richter et al., <http://www.jcb.org/cgi/content/full/jcb.201311014/DC1>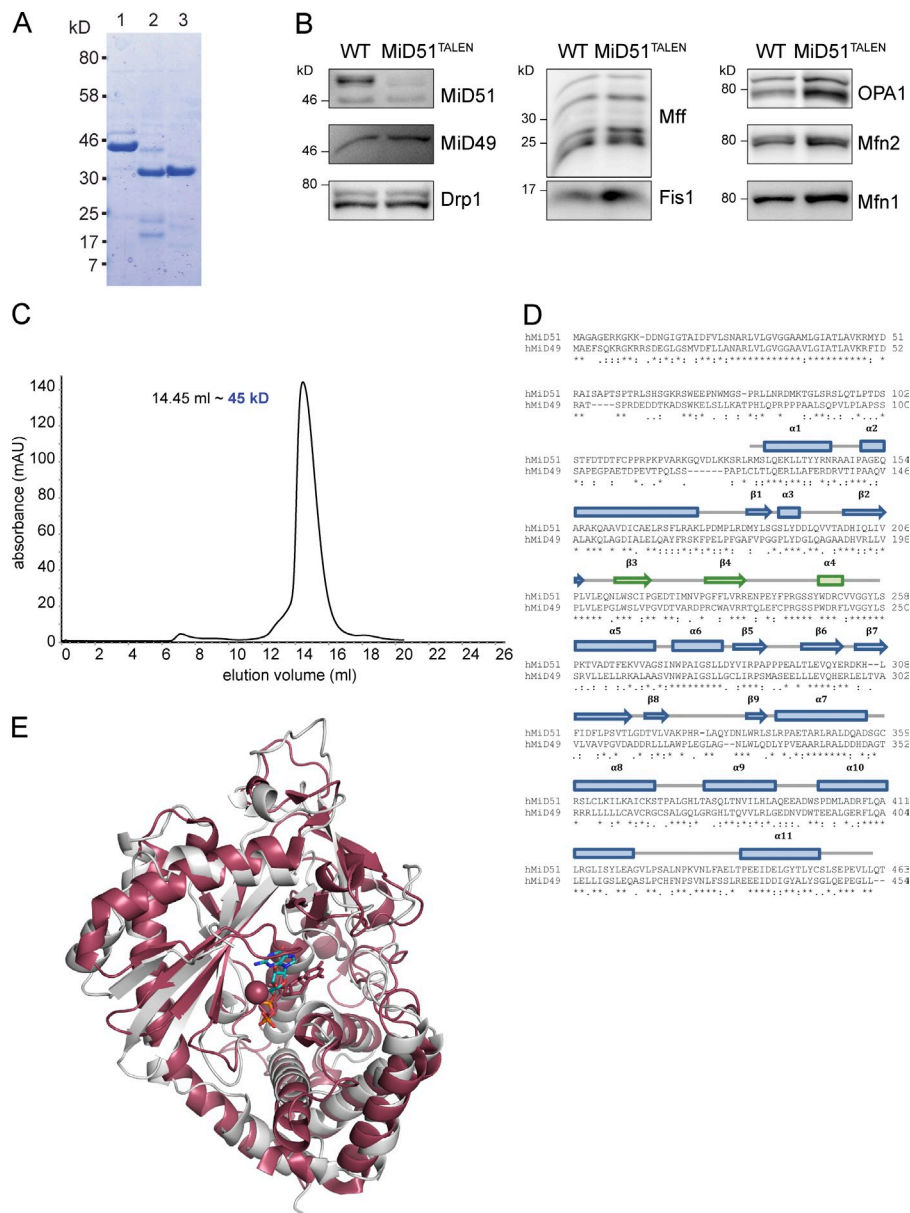

Figure S1. **Recombinant protein expression, TALEN knockout, and structural characterization of MiD51.** (A) Limited proteolysis of mouse MiD49<sup>AN50</sup> (1) using chymotrypsin (2) and trypsin (3). (B) Western blot analysis of mitochondrial proteins in wild-type MEFs and MEF clonal cell line lacking MiD51 (MiD51<sup>TALEN</sup>). (C) Gel filtration chromatogram of MiD51<sup>AN118</sup> eluting as a single peak, corresponding to a 45-kD species according to a standard curve. (D) Sequence alignment of MiD51 and MiD49. Sequence numbers and secondary structure elements are included above the alignment and colored as in Fig. 1 B. (E) Superimposition of wild-type MiD51 (gray) with cGAS (PDB accession no. 4JLZ; burgundy).

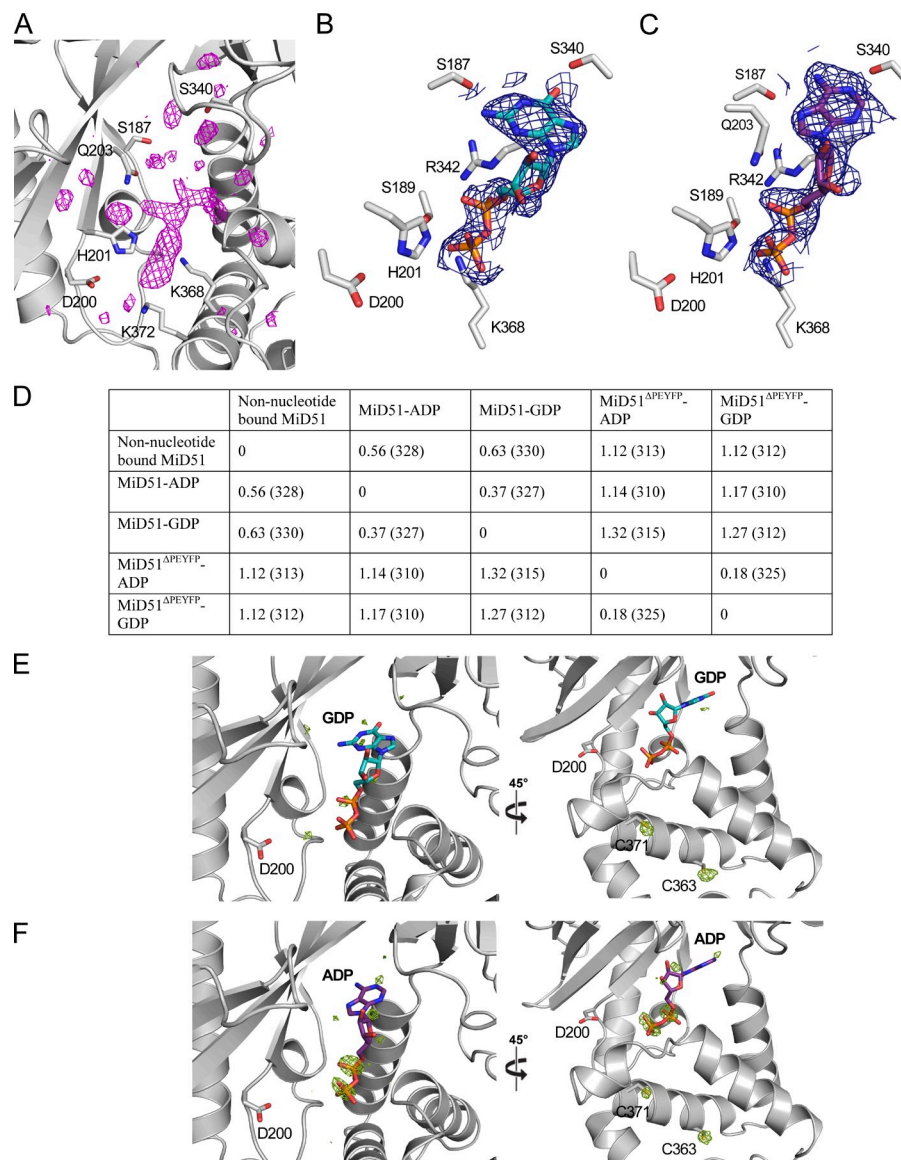

Figure S2. **Structural characterization of the MiD51 nucleotide binding pocket.** (A) Difference ( $F_o - F_{cwt}$ ) map displayed around the nucleotide binding pocket of native MiD51 showing additional unidentified density. Map was rendered in Pymol, contoured at  $3.0 \delta$ , and carved at  $5.0 \text{ \AA}$ . (B and C) Simulated aneal omit maps (dark blue) calculated in PHENIX for GDP (B) and ADP (C) molecules, contoured at  $1 \delta$ . (D) RMSDs between monomers of all crystallized forms of MiD51 and MiD51<sup>ΔPEYFP</sup>. For structures containing four monomers in the asymmetric unit, the monomer lacking the fewest atoms was used for alignments. Aligned  $\alpha$ -carbons are indicated in parentheses. (E and F) Anomalous difference map (green) of nucleotide binding pocket in GDP-MiD51 (E) and ADP-MiD51 (F) generated in FFT and contoured at  $3.0 \delta$ . Anomalous signal for two sulfurs on C363 and C371 is shown in  $45^\circ$  rotations, as well as for the two phosphates in ADP.

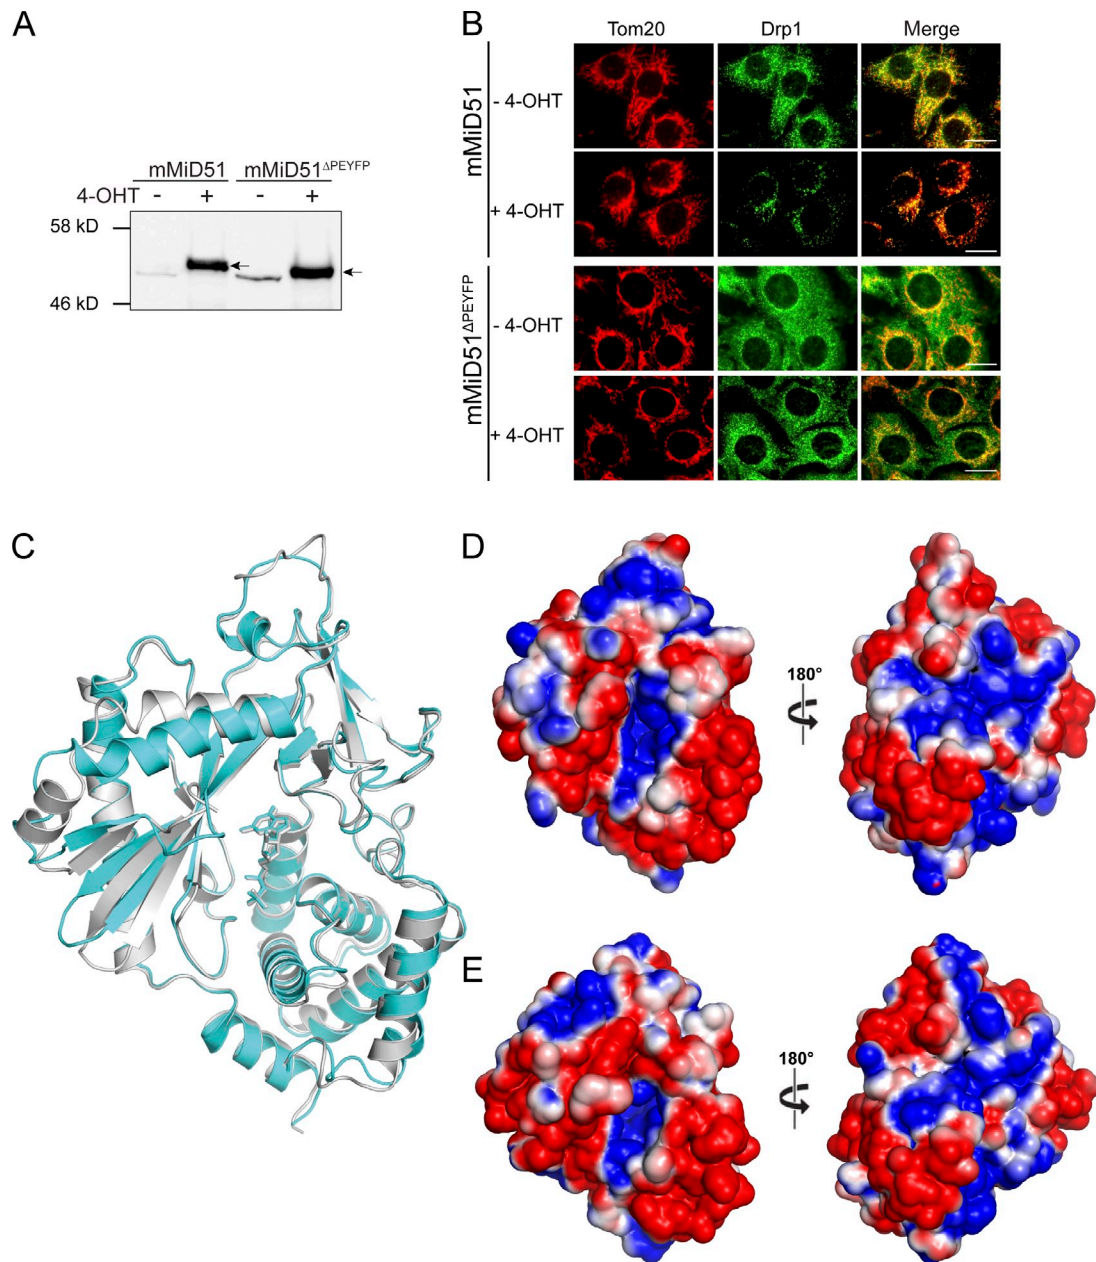

Figure S3. **Structural and functional analysis of the MiD51<sup>ΔPEYFP</sup> mutant.** 4-OHT-induced expression of wild-type mouse MiD51 or MiD51<sup>ΔPEYFP</sup> in lentiviral-transduced MiD51<sup>TALEN</sup> cells lacking endogenous MiD51 was analyzed by immunoblotting (A) and cells were immunostained for the mitochondrial marker protein Tom20 (red) and Drp1 (green; B). Bars, 20  $\mu$ m. (C) SSM superposition of GDP-MiD51<sup>ΔN118</sup> (gray) and GDP-MiD51<sup>ΔN118/PEYFP</sup> (cyan) crystal structures. (D) Electrostatic surface potential of MiD51<sup>ΔN118</sup>. (E) Electrostatic surface potential of MiD51<sup>ΔN118/PEYFP</sup>.

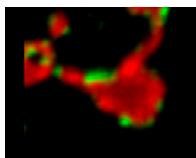

Video 1. **Time-lapse imaging showing a fission event at MiD51-GFP foci in a COS-7 cell.** COS-7 cells were transfected with MiD51-GFP (green) and stained for mitochondria with MitoTracker deep red (red). Time-lapse image analysis was performed using a laser-scanning confocal microscope (LSM 510; Carl Zeiss) equipped with a ConfoCor 3 system containing an avalanche photodiode detector using a 40x oil objective. Images were recorded every 5.5 s.

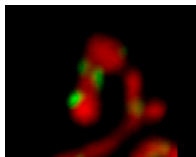

Video 2. **Time-lapse imaging showing a fission event at MiD51-GFP foci in a COS-7 cell.** COS-7 cells were transfected with MiD51-GFP (green) and stained for mitochondria with MitoTracker deep red (red). Time-lapse image analysis was performed using a laser-scanning confocal microscope (LSM 510; Carl Zeiss) equipped with a ConfoCor 3 system containing an avalanche photodiode detector using a 40x oil objective. Images were recorded every 5.5 s.

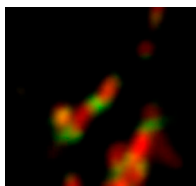

Video 3. **Fission events occur at MiD51<sup>NBD</sup>-GFP foci.** MiD51<sup>TALEN</sup> MEFs were induced for 4 h with 100 nM 4-OHT to express MiD51-GFP or MiD51<sup>NBD</sup>-GFP (green). Cells were stained for mitochondria with MitoTracker red (red). A composite of three separate fission events in different cells is shown. Time-lapse image analysis was performed using a laser-scanning confocal microscope (LSM 510; Carl Zeiss) equipped with a ConfoCor 3 system containing an avalanche photodiode detector using a 40x oil objective. Images were recorded every 5.5 s.
